1 **Factors associated with maternal tetanus vaccination in Myanmar: An analysis of Demographic**  
2 **and Health Survey data**

3 Zau Ring<sup>a</sup>, Zaw Myo Tun<sup>b</sup>, Clarence C Tam<sup>b,c</sup>

4 <sup>a</sup> Vector Borne Diseases Control Program, Kachin State Public Health Department, Ministry of Health and  
5 Sports, Myanmar

6 Kachin State Public Health Department Office, Yone Gyi Street, Ayar Quarter, Myitkyina, Myanmar

7 <sup>b</sup> Saw Swee Hock School of Public Health, National University of Singapore

8 12 Science Drive 2, #10-01, Singapore 117549

9 <sup>c</sup> London School of Hygiene & Tropical Medicine

10 Keppel Street, London WC1E 7HT

11

12 Corresponding author:

13 Zaw Myo Tun (Email: [zawmyotun@nus.edu.sg](mailto:zawmyotun@nus.edu.sg))

14 Saw Swee Hock School of Public Health, National University of Singapore

15 12 Science Drive 2, #10-01, Singapore 117549

16

17 Word counts

18 Fulltext: 1807

19 Abstract: 249

20

21 Keywords:

22 Tetanus toxoid vaccination; Myanmar; Universal health coverage; Epidemiology; Demographic

23 Health Survey

*March 9, 2021*

*Page 1 of 16*

**NOTE: This preprint reports new research that has not been certified by peer review and should not be used to guide clinical practice.**

1    **Abstract**

2    **Background:** Tetanus toxoid vaccination is a life-saving maternal and child health intervention. Understanding  
3    gaps in maternal vaccination coverage is key to informing progress towards universal health coverage. We  
4    assessed maternal tetanus vaccination coverage in Myanmar and investigated factors associated with being  
5    unvaccinated.

6    **Method:** We analysed 2015-16 Demographic and Health Survey data including women aged 15-49 years with  
7    at least one childbirth in the last five years. The outcome was self-reported receipt of tetanus vaccine at least  
8    once during the last pregnancy. We used logistic regression models to assess factors associated with being  
9    unvaccinated.

10   **Results:** Overall maternal tetanus vaccination coverage was 85.7%. Sub-national coverage was lowest in the  
11   predominantly ethnic minority states of Shan, Kayin, and Chin at 69.6%, 77.4%, and 79.9%, respectively.  
12   Factors associated with a lack of vaccination were: not receiving antenatal care (odds ratio (OR): 18.99, 95%  
13   confidence interval (CI): 14.21, 25.39); receiving antenatal care at home (OR: 2.05, 95% CI: 1.46, 2.88), private  
14   and non-governmental organization clinics (OR: 2.88, 95% CI: 1.81, 4.58, compared to public facilities); and  
15   not wanting to go to a health facility alone (OR: 1.53, 95% CI: 1.14, 2.06). Higher educational attainment was  
16   associated with lower odds of being unvaccinated (OR: 0.48, 95% CI: 0.32, 0.70 for secondary relative to no  
17   education).

18   **Interpretation:** We identified regional, structural, and individual differences in maternal tetanus vaccination  
19   coverage. Achieving universal coverage of maternal tetanus vaccination will largely depend on the ability to  
20   provide accessible antenatal care to most women who do not currently receive it.

21

1     **Introduction**

2     Maternal and neonatal tetanus (MNT) is a devastating disease with a high case fatality, especially in low-income  
3     settings [1]. The World Health Organization (WHO) estimated 25,000 new-borns died from neonatal tetanus in  
4     2018 [1]. MNT remains a significant public health problem in 12 countries, most of them are in Asia and Africa  
5     [1]. MNT death is preventable by hygienic delivery, cord care practices, and by immunizing children and  
6     pregnant women with inexpensive and efficacious Tetanus Toxoid (TT) vaccine [1]. In the last 30 years,  
7     vaccinating pregnant women in their second or third trimester has reduced tetanus-related neonatal mortality by  
8     94% [2]. WHO recommends that “all women giving birth and their newborn babies should be protected against  
9     tetanus” and that countries should ensure that a national policy and strategies to achieve high vaccination  
10    coverage among pregnant women are available and are correctly implemented [3].

11    Myanmar, with a population of 51.5 million [4], is composed of seven States, in which each of seven ethnic  
12    minority group mostly live, and eight Regions of majority Burmese ethnicity. Tetanus vaccination for pregnant  
13    women has been part of the routine Expanded Program on Immunization in Myanmar since 1978 [5]. Although  
14    MNT was eliminated (defined as <1 MNT per 1000 live births in every district) in Myanmar in 2010 [6], the  
15    MNT burden and gaps in MNT preventive services remains: 231 neonatal tetanus cases were reported from  
16    2011 to 2018, and 64% of mothers of neonatal tetanus cases in 2018 were unimmunized [7]; only 72% of  
17    women giving birth in the previous five years are protected against neonatal tetanus [5].

18    Factors associated with maternal tetanus vaccination are not well understood. The Myanmar Ministry of Health  
19    and Sports launched the five-year National Health Plan in December 2016 to achieve universal health coverage  
20    by 2030, aiming to ensure access to a basic essential package of health services by the entire population while  
21    increasing financial protection [8]. Maternal tetanus vaccination is listed as a component of the essential  
22    package [9]. Information on factors associated with maternal tetanus under-vaccination would be useful to  
23    inform the implementation strategy. We estimated maternal tetanus vaccination coverage at both national and  
24    subnational levels using 2015-16 Demographic and Health Survey (DHS) data. We also investigated factors  
25    associated with a lack of vaccination among women reporting pregnancy in the previous five years.

26    **Methods**

27    We used maternal health data from the 2015-16 Myanmar DHS dataset. In this analysis, we included women  
28    who reported giving birth in the last five years. Outcome was self-reported tetanus vaccination during the last  
29    pregnancy. We estimated national and subnational (States and Regions) vaccine coverage with corresponding

1 95% confidence intervals (CIs), using sampling weights to account for the DHS survey design. Vaccine  
2 coverage is the percentage of women who reported receiving at least one tetanus toxoid injections during their  
3 last pregnancy.

4 We selected 14 variables in three domains related to receiving the vaccine: (1) Socio-demographic: state or  
5 region of residence, urban/rural residence, age, birth order of the last pregnancy, educational attainment,  
6 occupation type, household wealth quintiles; (2) Women's agency: whether the respondent needed permission  
7 from others to obtain medical help, who usually made decisions about the respondent's healthcare, whether the  
8 respondent was willing to go to a health facility alone; (3) Healthcare access: whether the last delivery was a  
9 caesarean section, whether the respondent had enough money for treatment of health problems, distance to the  
10 nearest health facility, where the respondent received antenatal care (at home, at a public clinic, a non-  
11 governmental organization clinic, a private clinic, or none received).

12 We conceptualized the domains of explanatory variables in a hierarchical framework [10]. In this framework,  
13 we hypothesized that vaccination was influenced by proximal factors related to healthcare access, which were  
14 themselves influenced by factors related to women's agency and autonomy in seeking care. These in turn were  
15 influenced by socio-demographic characteristics and place of residence (Figure 1).

16 We used logistic regression models to investigate factors associated with a lack of tetanus vaccination during  
17 pregnancy. In Model 1, we included distal factors of socio-demographic variables and summarized using odds  
18 ratios (ORs) and their corresponding CIs. In Model 2, we added factors of women's agency to Model 1. In the  
19 last model, we added variables of healthcare access domain to model 2. We performed modelling with and  
20 without accounting for the sampling weight and compared the results. All analyses were conducted in R  
21 (version 3.5.1) [11] and survey analysis was performed using survey package [12].

#### 22 *Ethics statement*

23 Ethical approval was not required as this is a secondary analysis of publicly available data.

#### 24 *Role of the funding source*

25 No funding was received for this work.

1 **Results**

2 *Maternal tetanus vaccination coverage*

3 A total of 3582 women reported giving birth in the previous five years. Of these, 58 (1.6%) reported not  
4 knowing whether they had received tetanus vaccination during pregnancy and were excluded, leaving 3524 for  
5 analysis. Of these, 2412 (68%) were from Regions and 2699 (77%) resided in rural areas. The median age was  
6 31 years (interquartile range: 26, 36). A third of women (1204, 34%) had their first childbirth in the previous  
7 five years. Most women (2941, 83%) had at least primary school education (Table 1).

8 Overall, 85.7% (95% CI: 83.0%, 88.3%) of women had received tetanus vaccine during pregnancy. Coverage  
9 was highest in Mon State (95.0%) and lowest in Shan State (69.6%). Coverage was also higher in urban relative  
10 to rural areas and among women who attained secondary or higher education, and increased with increasing  
11 wealth quintiles. Conversely, coverage decreased with increasing parity and was lower among women in  
12 agricultural occupations (Table 1).

13 *Factors associated with lack of vaccination*

14 In Model 1, rural residence and higher parity were associated with higher odds of being unvaccinated, while  
15 older age, higher educational level and higher wealth quintiles were associated with lower odds of being  
16 unvaccinated. However, most of these associations were attenuated following the inclusion of intermediate and  
17 proximal variables, with only educational attainment remaining strongly associated with vaccination status  
18 (Table 2).

19 In Model 3, lack of antenatal care (OR: 18.99, 95% CI: 14.21, 25.39), or receiving antenatal care at home (OR:  
20 2.05, 95% CI: 1.46, 2.88) or at private or non-governmental organization (NGO) facilities (OR: 2.88, 95% CI:  
21 1.81, 4.58) were all strongly associated with increased odds of being unvaccinated relative to receiving antenatal  
22 care at public health facilities. In addition, women who reported not wanting to seek healthcare on their own  
23 were more likely to be unvaccinated (OR: 1.53, 95% CI: 1.14, 2.06). In contrast, higher educational attainment  
24 was associated with lower odds of being unvaccinated (OR: 0.48, 95% CI: 0.32, 0.70 for secondary relative to  
25 no education). Multivariable analysis accounting for survey sampling weights yielded largely similar results  
26 (Appendix 2).

1 **Discussion**

2 We found high overall coverage of maternal tetanus vaccination in Myanmar. Despite this, there were important  
3 regional variations, with three States reporting <80% coverage. Notably, coverage was lower in rural areas,  
4 among women of higher parity, lower educational attainment, and lower wealth quintiles. Our analysis indicates  
5 these inequalities are largely mediated through differences in access to healthcare and antenatal care. Among  
6 socio-demographic variables, only educational attainment remained strongly associated with vaccination status  
7 after controlling for healthcare access variables. A lack of antenatal care or receiving antenatal care other than in  
8 public healthcare facilities were strongly associated with being unvaccinated.

9 Our results revealed that the proportion of unvaccinated women was highest in Shan, Kayin and Chin States.  
10 This likely reflects challenges in providing maternal health services in conflict-affected areas, particularly in  
11 Shan[13] and Kayin States [14]. Chin State is highly mountainous with few transportation links, which poses  
12 challenges for access to maternal health services [15]. Antenatal care is recognized as a key strategy to deliver  
13 tetanus vaccination and sustain the MNT elimination [16]. However, antenatal care coverage (at least one  
14 antenatal visit throughout pregnancy) in areas of ethnic and community based health organizations in these areas  
15 is much lower than the national coverage [17]. Another study using DHS data also observed regional differences  
16 in antenatal care coverage (at least four antenatal visits): the coverage in Shan, Kayin and Chin States ranged  
17 from 37 to 50%, compared with the coverage in Yangon Region of 82% [18].

18 Of particular concern is the low vaccination coverage among women who did not access or receive antenatal  
19 care. Approximately 1 in 8 women reported not receiving any antenatal care and of these, less than half reported  
20 receiving tetanus vaccination. Studies have shown that maternal tetanus immunization is associated with receipt  
21 of antenatal care in Pakistan [19] and with higher number of antenatal care visits in Kenya, Egypt and Ethiopia  
22 [20-22]. Our findings similarly point to gaps in antenatal care provision that need to be addressed as Myanmar  
23 works towards achieving universal health coverage.

24 In Myanmar, antenatal care services including maternal tetanus vaccination are provided through networks of  
25 health facilities/centres at the village level [23]. Our results show that this system can effectively provide  
26 immunization services to most women, although the lower coverage among women receiving antenatal care  
27 outside the public health sector – private or NGO facilities or at home – points to an opportunity to increase  
28 vaccination coverage in these sectors. Antenatal care at home is usually provided by trained midwives and lady  
29 health visitors, but in some rural areas care is provided by traditional birth attendants who are not trained to

1 administer vaccination. A study in Krabi Province, Thailand, found that although 91% of traditional birth  
2 attendants were aware of about the availability of an injection for antenatal care at the health centre, only half  
3 knew that it was for tetanus prevention [24], and this may point to similar gaps in the provision of home  
4 antenatal care in Myanmar.

5 Importantly, maternal tetanus vaccination was strongly associated with educational level, which remained  
6 independently associated after controlling for healthcare access variables. This suggests a synergistic  
7 opportunity for promoting access to both education and healthcare in generating demand for and acceptance of  
8 vaccination and improving maternal health outcomes. Lower maternal education is related to lower use of  
9 antenatal care services [25], while higher maternal education is also associated with higher uptake of maternal  
10 immunisation in several low-income countries, including India [26], Bangladesh [27], Kenya [20], and Malawi  
11 [28].

12 Several limitations should be considered when interpreting the results of this study. In common with other DHS  
13 surveys, maternal tetanus vaccination is self-reported and subject to inaccurate recall. However, a previous  
14 study from Brazil showed that self-reported uptake of maternal TT vaccination can be higher compared with  
15 information in medical records [29]. In addition, ethnicity and religion could be important determinants of  
16 maternal vaccination [30]. However, this information was not available in the survey.

17 Despite this, using data from a large, nationally representative, and geographically stratified survey, we were  
18 able to identify regional, structural, and individual differences in maternal tetanus vaccination coverage. Our  
19 findings indicate that achieving WHO's recommended target of protecting all pregnant women and babies  
20 against tetanus will largely depend on the ability to provide accessible antenatal care to the substantial fraction  
21 of women who currently do not currently receive it.

## 22 **Data sharing**

23 The 2015-16 DHS Myanmar dataset is accessible upon request from: <https://dhsprogram.com/>

## 24 **Conflict of interest**

25 We declare no competing interest.

1 **Contributors**

2 ZR, ZMT, and CCT conceived the study. ZR obtained the data. ZR analysed and interpreted the data. ZR wrote  
3 the first draft of the report. ZR, ZMT, and CCT contributed to the writing of the report. All authors agreed with  
4 report results and conclusions. ZMT and CCT accessed and verified the underlying data.

5 **Acknowledgements**

6 We thank the Demographic and Health Survey Program for providing data for this analysis.



1 **Figure 1. Hierarchical framework of factors associated with maternal tetanus vaccination**

2  
3  
4

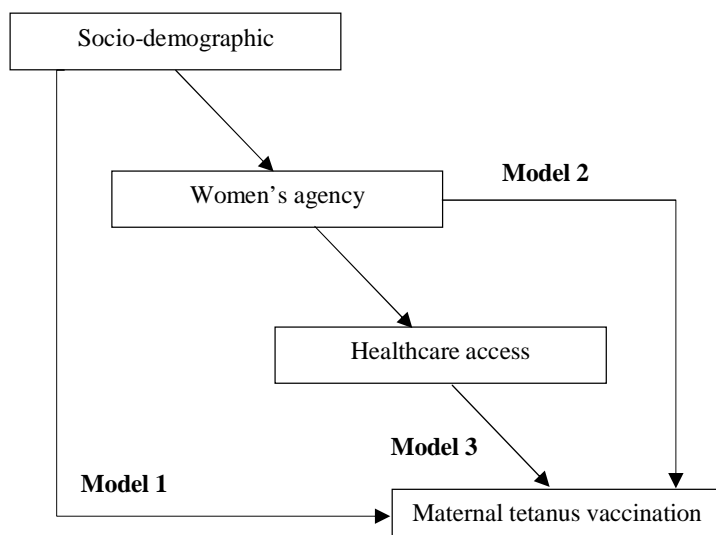

1

2 **Table 1. Socio-demographic characteristics of women in our study and their maternal tetanus vaccination**  
 3 **status during their last pregnancy (Sample weight-adjusted)**

|                                    | N    | %    | Vaccine coverage* |      |              |
|------------------------------------|------|------|-------------------|------|--------------|
|                                    |      |      | n                 | %    | (95% CI)     |
| Overall                            | 3524 |      | 3019              | 85.7 | (83.0, 88.3) |
| States and Regions                 |      |      |                   |      |              |
| Shan State                         | 454  | 12.9 | 316               | 69.6 | (56.1, 83.1) |
| Kayin State                        | 110  | 3.1  | 85                | 77.4 | (63.6, 91.3) |
| Chin State                         | 43   | 1.2  | 34                | 79.9 | (68.0, 91.8) |
| Ayeyarwaddy Region                 | 492  | 14.0 | 417               | 84.9 | (77.4, 92.4) |
| Taninthayi Region                  | 98   | 2.8  | 84                | 85.6 | (76.2, 95.0) |
| Sagaing Region                     | 394  | 11.2 | 338               | 85.9 | (76.8, 95.1) |
| Rakhine State                      | 234  | 6.7  | 202               | 86.1 | (79.4, 92.7) |
| Magway Region                      | 263  | 7.5  | 230               | 87.6 | (82.1, 93.0) |
| Naypyidaw Union Territory (Region) | 82   | 2.3  | 73                | 88.5 | (83.7, 93.3) |
| Bago Region                        | 322  | 9.2  | 292               | 90.6 | (86.6, 94.5) |
| Yangon Region                      | 383  | 10.9 | 349               | 91.0 | (86.3, 95.8) |
| Mandalay Region                    | 378  | 10.7 | 347               | 91.7 | (87.5, 95.9) |
| Kachin State                       | 131  | 3.7  | 119               | 91.3 | (84.1, 98.5) |
| Kayah State                        | 23   | 0.7  | 21                | 93.4 | (88.9, 97.9) |
| Mon State                          | 118  | 3.3  | 112               | 95.0 | (91.4, 98.7) |
| State or Region of residence       |      |      |                   |      |              |
| Region                             | 2412 | 68.4 | 2130              | 88.3 | (85.7, 90.9) |
| State                              | 1112 | 31.6 | 889               | 80.0 | (73.8, 86.1) |
| Type of residence                  |      |      |                   |      |              |
| Urban                              | 825  | 23.4 | 755               | 91.5 | (88.6, 94.3) |
| Rural                              | 2699 | 76.6 | 2264              | 89.9 | (80.6, 87.2) |
| Age group of women                 |      |      |                   |      |              |
| 15-25                              | 655  | 18.6 | 549               | 83.8 | (79.3, 88.3) |
| 25-30                              | 913  | 25.9 | 786               | 86.1 | (82.3, 89.9) |
| 30-35                              | 898  | 25.5 | 779               | 86.8 | (83.7, 89.9) |
| 35-49                              | 1059 | 30.1 | 906               | 85.5 | (82.0, 89.0) |
| Birth order of last pregnancy      |      |      |                   |      |              |
| 1 <sup>st</sup>                    | 1204 | 34.2 | 1070              | 88.9 | (86.4, 91.3) |
| 2 <sup>nd</sup>                    | 906  | 25.7 | 807               | 89.0 | (85.7, 92.4) |
| 3 <sup>rd</sup> , 4 <sup>th</sup>  | 929  | 26.4 | 781               | 84.1 | (80.9, 87.2) |
| >4 <sup>th</sup>                   | 485  | 13.8 | 361               | 74.5 | (66.6, 82.5) |
| Highest education level of woman   |      |      |                   |      |              |
| No education                       | 583  | 16.6 | 393               | 67.4 | (58.3, 76.6) |
| Primary                            | 1598 | 45.3 | 1379              | 86.3 | (83.5, 89.1) |
| Secondary                          | 1051 | 29.8 | 969               | 92.1 | (90.1, 94.2) |
| Higher                             | 292  | 8.3  | 278               | 95.3 | (92.3, 98.4) |
| Woman's occupation type            |      |      |                   |      |              |
| Unskilled manual                   | 864  | 24.6 | 713               | 82.5 | (77.2, 87.9) |

|                                      |      |      |      |      |              |
|--------------------------------------|------|------|------|------|--------------|
| Skilled manual                       | 181  | 5.2  | 166  | 91.4 | (86.5, 96.3) |
| Professionals, technical, Managerial | 142  | 4.0  | 133  | 93.6 | (88.4, 98.7) |
| Sales                                | 530  | 15.1 | 471  | 88.7 | (85.2, 92.3) |
| Agricultural self-employed           | 303  | 8.6  | 267  | 88.3 | (83.1, 93.4) |
| Agricultural employee                | 198  | 5.6  | 138  | 69.9 | (54.8, 84.9) |
| Others                               | 59   | 1.7  | 52   | 89.1 | (78.2, 100)  |
| Not working                          | 1236 | 35.2 | 1072 | 86.7 | (83.2, 90.2) |
| Wealth quintiles                     |      |      |      |      |              |
| Lowest                               | 938  | 26.6 | 749  | 80.0 | (75.1, 84.6) |
| Second                               | 794  | 22.5 | 686  | 86.4 | (81.9, 91.0) |
| Middle                               | 660  | 18.7 | 567  | 85.9 | (82.3, 89.4) |
| Fourth                               | 577  | 16.4 | 510  | 88.5 | (84.8, 92.1) |
| Highest                              | 556  | 15.8 | 507  | 91.2 | (85.7, 96.6) |

1 CI, Confidence Interval

2 \* Percentage of women who reported the receipt of at least one tetanus toxoid injections during their last

3 pregnancy

- 1 Table 2. Factors associated with a lack of maternal tetanus vaccination (Sampling weight not adjusted)
- 2 Model 1 – Socio-demographic variables
- 3 Model 2 – Model 1 + Women’s agency variables
- 4 Model 3 – Model 2 + Healthcare access variables

|                                                        | Unadjusted OR (95% CI) | Adjusted OR (95% CI) |                   |                   |
|--------------------------------------------------------|------------------------|----------------------|-------------------|-------------------|
|                                                        |                        | Model 1              | Model 2           | Model 3           |
| <b>Demographic, Pregnancy and Socioeconomic Domain</b> |                        |                      |                   |                   |
| Residence                                              |                        |                      |                   |                   |
| Region or Union Territory                              | 1                      | 1                    | 1                 | 1                 |
| State                                                  | 1.37 (1.14, 1.65)      | 0.99 (0.81, 1.22)    | 0.90 (0.72, 1.12) | 0.81 (0.63, 1.04) |
| Type of place of residence                             |                        |                      |                   |                   |
| Urban                                                  | 1                      | 1                    | 1                 | 1                 |
| Rural                                                  | 2.51 (1.89, 3.32)      | 1.62 (1.18, 2.23)    | 1.43 (1.02, 1.99) | 1.11 (0.76, 1.61) |
| Age group of women                                     |                        |                      |                   |                   |
| 15-25                                                  | 1                      | 1                    | 1                 | 1                 |
| 25-30                                                  | 0.78 (0.59, 1.03)      | 0.75 (0.55, 1.03)    | 0.76 (0.55, 1.05) | 0.78 (0.54, 1.13) |
| 30-35                                                  | 0.76 (0.57, 1.01)      | 0.58 (0.41, 0.83)    | 0.62 (0.43, 0.88) | 0.75 (0.50, 1.13) |
| 35-49                                                  | 1.00 (0.77, 1.29)      | 0.52 (0.36, 0.75)    | 0.53 (0.36, 0.78) | 0.67 (0.43, 1.04) |
| Birth order of last pregnancy                          |                        |                      |                   |                   |
| 1st                                                    | 1                      | 1                    | 1                 | 1                 |
| 2nd                                                    | 0.90 (0.68, 1.20)      | 0.87 (0.64, 1.19)    | 0.91 (0.66, 1.25) | 0.79 (0.55, 1.14) |
| 3rd, 4th                                               | 1.32 (1.02, 1.70)      | 1.23 (0.89, 1.69)    | 1.19 (0.86, 1.67) | 0.93 (0.64, 1.37) |
| >4th                                                   | 2.80 (2.17, 3.62)      | 2.14 (1.46, 3.13)    | 2.18 (1.47, 3.25) | 1.29 (0.81, 2.05) |
| Highest education level of woman                       |                        |                      |                   |                   |
| No education                                           | 1                      | 1                    | 1                 | 1                 |
| Primary                                                | 0.37 (0.30, 0.46)      | 0.45 (0.35, 0.57)    | 0.46 (0.36, 0.59) | 0.66 (0.49, 0.89) |
| Secondary                                              | 0.17 (0.13, 0.23)      | 0.26 (0.19, 0.36)    | 0.27 (0.19, 0.37) | 0.48 (0.32, 0.70) |
| Higher                                                 | 0.07 (0.04, 0.14)      | 0.20 (0.09, 0.43)    | 0.19 (0.08, 0.42) | 0.29 (0.12, 0.69) |
| Woman's occupation type                                |                        |                      |                   |                   |
| Unskilled manual                                       | 1                      | 1                    | 1                 | 1                 |
| Skilled manual                                         | 0.58 (0.34, 1.01)      | 1.14 (0.64, 2.01)    | 1.06 (0.58, 1.95) | 1.03 (0.52, 2.03) |
| Professionals, technical, Managerial                   | 0.25 (0.12, 0.52)      | 0.55 (0.25, 1.22)    | 0.49 (0.21, 1.14) | 0.58 (0.24, 1.43) |
| Sales                                                  | 0.57 (0.41, 0.80)      | 1.06 (0.74, 1.52)    | 1.03 (0.70, 1.51) | 1.31 (0.86, 2.01) |
| Agricultural self-employed                             | 1.17 (0.85, 1.60)      | 1.16 (0.83, 1.62)    | 1.01 (0.71, 1.44) | 0.94 (0.62, 1.41) |
| Agricultural employee                                  | 1.68 (1.14, 2.46)      | 1.68 (1.12, 2.51)    | 1.63 (1.07, 2.48) | 1.29 (0.79, 2.10) |
| Others                                                 | 0.40 (0.14, 1.12)      | 1.18 (0.40, 3.46)    | 1.27 (0.43, 3.74) | 1.15 (0.36, 3.72) |
| Not working                                            | 0.88 (0.69, 1.12)      | 1.11 (0.86, 1.43)    | 1.10 (0.85, 1.44) | 1.08 (0.80, 1.46) |
| Wealth quintiles                                       |                        |                      |                   |                   |
| Lowest                                                 | 1                      | 1                    | 1                 | 1                 |
| Second                                                 | 0.59 (0.46, 0.75)      | 0.72 (0.56, 0.94)    | 0.72 (0.55, 0.94) | 0.77 (0.56, 1.05) |
| Middle                                                 | 0.49 (0.38, 0.64)      | 0.67 (0.50, 0.89)    | 0.73 (0.54, 0.99) | 0.90 (0.63, 1.27) |
| Fourth                                                 | 0.38 (0.28, 0.52)      | 0.64 (0.46, 0.90)    | 0.72 (0.51, 1.02) | 0.91 (0.61, 1.35) |
| Highest                                                | 0.30 (0.21, 0.42)      | 0.59 (0.40, 0.87)    | 0.65 (0.43, 0.98) | 0.91 (0.56, 1.45) |
| <b>Women's agency</b>                                  |                        |                      |                   |                   |
| Getting permission to go for medical help              |                        |                      |                   |                   |

|                                               |                      |                   |                      |
|-----------------------------------------------|----------------------|-------------------|----------------------|
| Not a big problem                             | 1                    | 1                 | 1                    |
| Big problem                                   | 2.62 (1.92, 3.58)    | 1.41 (0.97, 2.04) | 1.25 (0.81, 1.93)    |
| Person who usually decide woman's health care |                      |                   |                      |
| Self                                          | 1                    | 1                 | 1                    |
| With others                                   | 1.06 (0.86, 1.31)    | 1.01 (0.81, 1.26) | 0.97 (0.75, 1.25)    |
| By others                                     | 1.21 (0.92, 1.59)    | 0.90 (0.67, 1.20) | 0.75 (0.53, 1.04)    |
| Woman not wanting to go alone                 |                      |                   |                      |
| Not a big problem                             | 1                    | 1                 | 1                    |
| Big problem                                   | 2.28 (1.89, 2.75)    | 1.67 (1.35, 2.07) | 1.53 (1.14, 2.06)    |
| <b>Healthcare Access</b>                      |                      |                   |                      |
| Last birth a caesarean section                |                      |                   |                      |
| No                                            | 1                    |                   | 1                    |
| Yes                                           | 0.32 (0.23, 0.45)    |                   | 0.90 (0.59, 1.37)    |
| Getting money needed for treatment of woman   |                      |                   |                      |
| Not a big problem                             | 1                    |                   | 1                    |
| Big problem                                   | 1.95 (1.61, 2.35)    |                   | 1.10 (0.83, 1.46)    |
| Distance to health facility                   |                      |                   |                      |
| Not a big problem                             | 1                    |                   | 1                    |
| Big problem                                   | 2.7 (2.24, 3.26)     |                   | 1.07 (0.78, 1.47)    |
| Place of antenatal care                       |                      |                   |                      |
| Public health facilities                      | 1                    |                   | 1                    |
| Home                                          | 2.64 (1.94, 3.60)    |                   | 2.05 (1.46, 2.88)    |
| Private health facilities or NGO clinics      | 2.11 (1.40, 3.19)    |                   | 2.88 (1.81, 4.58)    |
| None                                          | 24.77 (19.26, 31.87) |                   | 18.99 (14.21, 25.39) |

1 CI, Confidence Interval; OR, Odds ratio

1     **References**

- 2     [1] World Health Organization. Maternal and Neonatal Tetanus Elimination (MNTE).
- 3     [2] World Health Organization. Maternal immunization and antenatal care service delivery situation analysis  
4     project. Geneva, Switzerland2020.
- 5     [3] World Health Organization. Maternal Immunization Against Tetanus. Geneva, Switzerland: World Health  
6     Organization; 2006.
- 7     [4] Ministry of Immigration and Population/Myanmar. The 2014 Population and Housing Census. Nay Pyi Taw,  
8     Myanmar2014.
- 9     [5] Ministry of Health Sports - MoHS/Myanmar, ICF. Myanmar Demographic and Health Survey 2015-16. Nay  
10    Pyi Taw, Myanmar: MoHS and ICF; 2017.
- 11    [6] United Nations. UN declares Myanmar free of maternal and neonatal tetanus. United Nations News; 2010.
- 12    [7] Ministry of Health Sports - MoHS/Myanmar. Neonatal Tetanus. Monthly Epidemiology Bulletin. 2019;3, 7.
- 13    [8] Ministry of Health and Sports/Myanmar. National Health Plan 2017-2021. Naypyitaw2016.
- 14    [9] Ministry of Health and Sports/Myanmar. National Health Plan: Annual Operational Plan (2018-2019).  
15    Naypyitaw2018.
- 16    [10] Victora CG, Huttly SR, Fuchs SC, Olinto MT. The role of conceptual frameworks in epidemiological  
17    analysis: a hierarchical approach. Int J Epidemiol. 1997;26:224-7.
- 18    [11] R Core Team. R: A language and environment for statistical computing. Vienna, Austria: R Foundation for  
19    Statistical Computing; 2019.
- 20    [12] Lumley T. survey: analysis of complex survey samples. 2020.
- 21    [13] Institute for Security & Development Policy. A Return to War:Militarized Conflicts inNorthern Shan State.  
22    Stockholm-Nacka, Sweden: European Union; 2018.
- 23    [14] Sandford S. Conflict Resumes in Karen State After Myanmar Army Returns. Washington: Voice of  
24    America; 2018.

- 1 [15] Soe KH. Transport infrastructure upgrades take shape in Chin State. Yangon, Myanmar: The Global New  
2 Light of Myanmar; 2020.
- 3 [16] World Health Organization. Protecting all against tetanus: guide to sustaining maternal and neonatal  
4 tetanus elimination (MNTE) and broadening tetanus protection for all populations. Geneva: World Health  
5 Organization, ; 2019.
- 6 [17] Davis B, Jolliffe K. Achieving Health Equity in Contested Areas of Southeast Myanmar. The Asia  
7 Foundation; 2016.
- 8 [18] Han SM, Rahman MM, Rahman MS, Swe KT, Palmer M, Sakamoto H, et al. Progress towards universal  
9 health coverage in Myanmar: a national and subnational assessment. *The Lancet Global Health*. 2018;6:e989-  
10 e97.
- 11 [19] Yousuf F, Haider G, Shaikh RB. Factors for inaccessibility of antenatal care by women in Sindh. *J Ayub*  
12 *Med Coll Abbottabad*. 2010;22:187-9.
- 13 [20] Haile ZT, Chertok IR, Teweldeberhan AK. Determinants of utilization of sufficient tetanus toxoid  
14 immunization during pregnancy: evidence from the Kenya Demographic and Health Survey, 2008-2009. *J*  
15 *Community Health*. 2013;38:492-9.
- 16 [21] Ahmed A, El-Berrawy M. Factors Affecting Maternal Tetanus Vaccination in Dakahlia Governorate,  
17 Egypt. *Journal of High Institute of Public Health*. 2019;49:30-5.
- 18 [22] Dubale Mamoro M, Kelbiso Hanfore L. Tetanus Toxoid Immunization Status and Associated Factors  
19 among Mothers in Damboya Woreda, Kembata Tembaro Zone, SNNP, Ethiopia. *J Nutr Metab*.  
20 2018;2018:2839579.
- 21 [23] Ministry of Health Sports - MoHS/Myanmar. National Guidelines for Antenatal Care For Service  
22 Providers. 2018. p. 9, 16.
- 23 [24] Chongsuvivatwong V, Bucharkorn L, Treetrong R. Traditional birth attendants in an endemic area of  
24 tetanus neonatorum in Thailand: pitfalls in the control program. *J Community Health*. 1991;16:325-31.
- 25 [25] Titaley CR, Dibley MJ, Roberts CL. Factors associated with underutilization of antenatal care services in  
26 Indonesia: results of Indonesia Demographic and Health Survey 2002/2003 and 2007. *BMC Public Health*.  
27 2010;10:485.

- 1 [26] Khan REA, Raza MA. Maternal health-care in India: The case of tetanus toxoid vaccination. Asian  
2 Development Policy Review. 2013;1:1-14.
- 3 [27] Rahman M. Tetanus toxoid vaccination coverage and differential between urban and rural areas of  
4 Bangladesh. East Afr J Public Health. 2009;6:26-31.
- 5 [28] Pathirana J, Nkambule J, Black S. Determinants of maternal immunization in developing countries.  
6 Vaccine. 2015;33:2971-7.
- 7 [29] Morón-Duarte LS, Ramirez Varela A, Bassani DG, Bertoldi AD, Domingues MR, Wehrmeister FC, et al.  
8 Agreement of antenatal care indicators from self-reported questionnaire and the antenatal care card of women in  
9 the 2015 Pelotas birth cohort, Rio Grande do Sul, Brazil. BMC Pregnancy and Childbirth. 2019;19:410.
- 10 [30] McGlynn N, Wilk P, Luginaah I, Ryan BL, Thind A. Increased use of recommended maternal health care  
11 as a determinant of immunization and appropriate care for fever and diarrhoea in Ghana: an analysis pooling  
12 three demographic and health surveys. Health Policy and Planning. 2014;30:895-905.
- 13
- 14
